# Supplementary material for: Possible pore size effects on the state of tris(8-quinolinato)aluminum(iii) (Alq3) adsorbed in mesoporous silicas and their temperature dependence
Source: Royal Society of Chemistry journal article supplement (doi:10.1039/b807593j), 2008-01-01
Supplement: b807593j.pdf [file b807593j.pdf]

Electronic Supplementary Material for PCCP  
This journal is © The Owner Societies 2008

Electronic Supplementary Material for PCCP  
This journal is © The Owner Societies 2008

Possible pore size effects on the state of tris(8-quinolinato)  
aluminum(III) ( $\text{Alq}_3$ ) adsorbed in mesoporous silicas and their  
temperature dependence

**Motohiro Tagaya and Makoto Ogawa\***

*Department of Earth Sciences, Waseda University, Nishiwaseda 1-6-1,  
Shinjuku-ku, Tokyo*

---

\* Author to whom correspondence should be addressed: Tel: +81-3-5286-1511; Fax:  
+81-3-3207-4950. E-mail: [makoto@waseda.jp](mailto:makoto@waseda.jp)

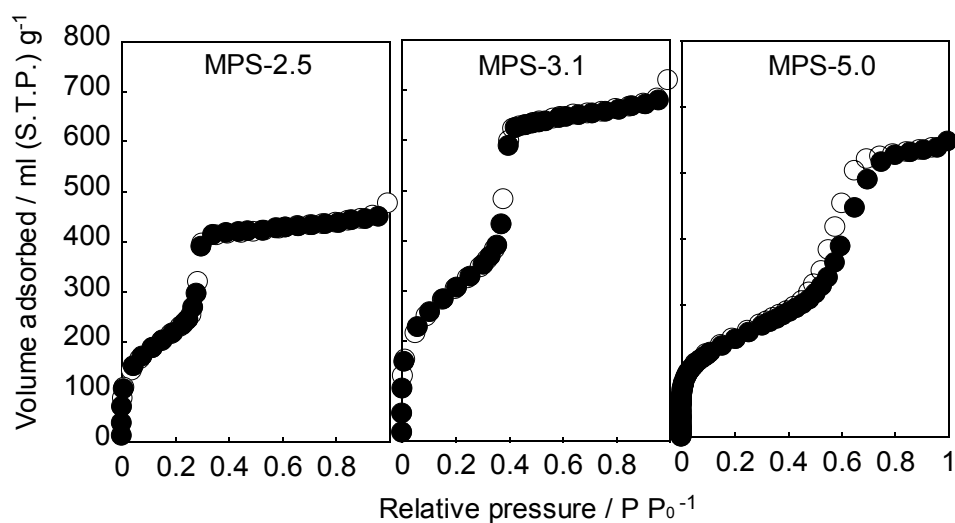

**Figure S1.** Nitrogen adsorption (closed circles) and desorption (open circles) isotherms of MPS-2.5, MPS-3.1 and MPS-5.0.

**Table S1.** BET surface area, porosity and pore volume of MPS-2.5, MPS-3.1 and MPS-5.0.

|         | $S_{\text{BET}} / \text{m}^2 \text{g}^{-1}$ | $2r_{\text{BJH}} / \text{nm}$ | $V / \text{ml g}^{-1}$ |
|---------|---------------------------------------------|-------------------------------|------------------------|
| MPS-2.5 | 975                                         | 2.5                           | 0.61                   |
| MPS-2.5 | 1091                                        | 3.1                           | 0.85                   |
| MPS-5.0 | 519                                         | 5.0                           | 0.65                   |

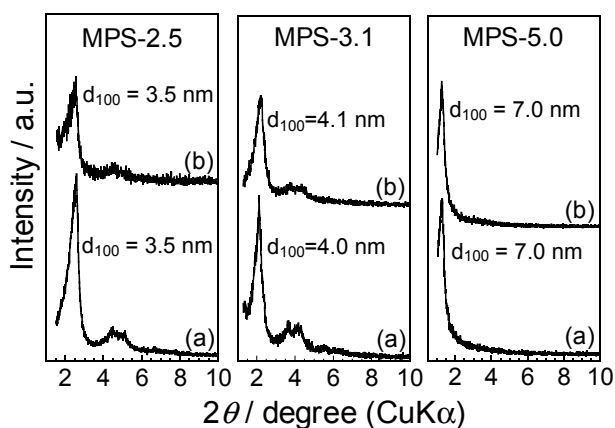

**Figure S2.** XRD patterns of MPS-2.5, MPS-3.1 and MPS-5.0 (a) before and (b) after the adsorption of  $\text{Alq}_3$  (the amount of  $\text{Alq}_3$  per the BET surface area: 207, 279 and 91  $\text{nmol} \cdot (\text{m}^2 \text{MPS})^{-1}$  for MPS-2.5, MPS-3.1 and MPS-5.0, respectively).

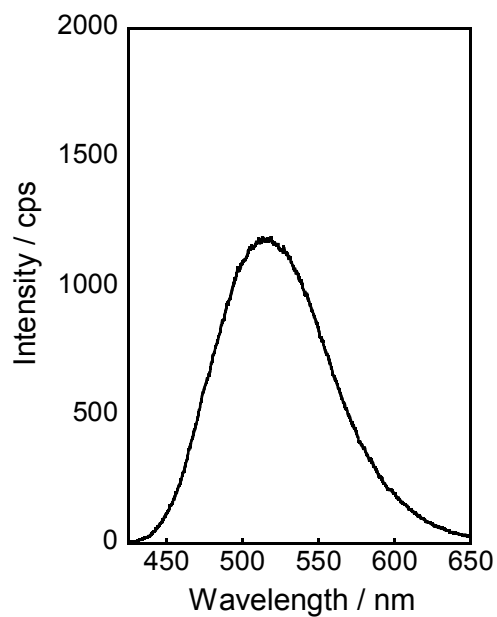

**Figure S3.** Photoluminescence spectrum of the Alq<sub>3</sub> in ethanol.

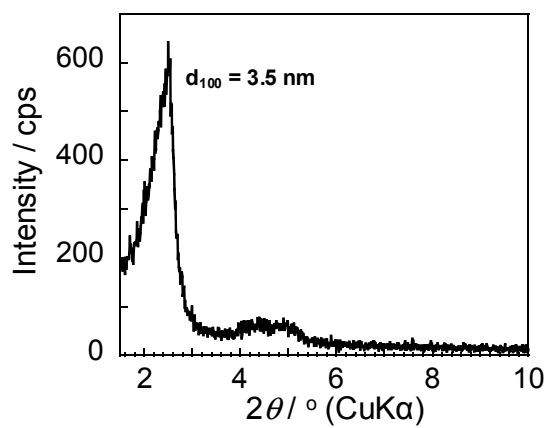

**Figure S4.** XRD pattern of the Alq<sub>3</sub> adsorbed in MPS-2.5 after heat treatment at 450 K.
